# Supplementary material
Source: PubMed Central journal article supplement (PMC4658285)
Supplement: NIHMS723479-supplement.pdf [file NIHMS723479-supplement.pdf]

## Credit Roster for the Comparison of AMD Treatments Trials

### Clinical Centers (Ordered by Number of Patients Enrolled)

**Certified Roles at Clinical Centers:** Clinic Coordinator (CC), Data Entry Staff (DE), Participating Ophthalmologist (O), Ophthalmic Photographer (OP); Optical Coherent Tomography Technician (OCT), Principal Investigator (PI), Refractionist (R), Visual Acuity Examiner (VA)

**Vitreoretinal Surgery, PA (Edina, MN):** David F. Williams, MD (PI); Sara Beardsley, COA (VA/R); Steven Bennett, MD (O); Herbert Cantrill, MD (O); Carmen Chan-Tram, COA (VA/R); Holly Cheshier, CRA, COT, OCTC (OP); Kathryn Damato, COT (VA); John Davies, MD (O); Sundeep Dev, MD (O); Julianne Enloe, CCRP, COA (CC); Gennaro Follano (OP/OCT); Peggy Gilbert, COA (VA/R); Jill Johnson, MD (O); Tori Jones, COA (OCT); Lisa Mayleben, COMT (CC/VA/R/OCT); Robert Mittra, MD (O); Martha Moos, COMT, OSA (VA/R); Ryan Neist, COMT (VA/R); Neal Oestreich, COT (CC); Polly Quiram, MD (O); Robert Ramsay, MD (O); Edwin Ryan, MD (O); Stephanie Schindeldecker, OA (VA/R); John Snater, COA (VA); Trenise Steele, COA (VA); Dwight Selders, COA (VA/R); Jessica Tonsfeldt, AO (OP/OCT); Shelly Valardi, COT (VA/R).

**Texas Retina Associates (Dallas, TX):** Gary Edd Fish, MD (PI); Hank A. Aguado, CRA (OP/OCT); Sally Arceneaux (CC/VA/R); Jean Arnwine (CC); Kim Bell, COA (VA/R); Tina Bell (CC/OCT); Bob Boleman (OP); Patricia Bradley, COT (CC); David Callanan, MD (O); Lori Coors, MD (O); Jodi Creighton, COA (VA/R); Timothy Crew, COA (OCT); Kimberly Cummings (OP/OCT); Christopher Dock (OCT); Karen Duignan, COT (VA/R); Dwain Fuller, MD (O); Keith Gray (OP/OCT); Betsy Hendrix, COT, ROUB (OCT); Nicholas Hesse (OCT); Diana Jaramillo, COA (OCT); Bradley Jost, MD (O); Sandy Lash (VA/R); Laura Lonsdale, CCRP (DE); Michael Mackens (OP/OCT); Karin Mutz, COA (CC); Michael Potts (VA/R); Brenda Sanchez (VA/R); William Snyder, MD (O); Wayne Solley, MD (O); Carrie Tarter (VA/R); Robert Wang, MD (O); Patrick Williams, MD (O).

**Southeastern Retina Associates (Knoxville, TN):** Stephen L. Perkins, MD (PI); Nicholas Anderson, MD (O); Ann Arnold, COT (VA/R); Paul Blais (OP/OCT); Joseph Googe, MD (O); Tina T. Higdon, (CC); Cecile Hunt (VA/R); Mary Johnson, COA (VA/R); James Miller, MD (O); Misty Moore (VA/R); Charity K. Morris, RN (CC); Christopher Morris (OP/OCT); Sarah Oelrich, COT (OP/OCT); Kristina Oliver, COA (VA/R); Vicky Seitz, COT (VA/R); Jerry Whetstone (OP/OCT).

**Retina Vitreous Consultants (Pittsburgh, PA):** Bernard H. Doft (PI); Jay Bedel, RN, (CC); Robert Bergren, MD (O); Ann Borthwick (VA/R); Paul Conrad, MD, PHD (O); Amanda Fec (OCT); Christina Fulwylie (VA/R); Willia Ingram (DE); Shawnique Latham (VA/R); Gina Lester (VA/R); Judy Liu, MD (O); Louis Lobes, MD (O); Nicole M. Lucko, (CC); Holly Mechling (CC); Lori Merlotti, MS, CCRC (CC); Keith McBroom (OCT); Karl Olsen, MD (O); Danielle Puskas, COA (VA/R); Pamela Rath, MD (O); Maria Schmucker (CC); Lynn Schueckler (OCT); Christina Schultz (CC/VA/R); Heather Shultz (OP/OCT); David Steinberg, CRA (OP/OCT); Avni Vyas, MD (O); Kim Whale (VA/R); Kimberly Yeckel, COA, COT (VA/R).

**Ingalls Memorial Hospital/Illinois Retina Associates (Harvey, IL):** David H. Orth, MD (PI); Linda S. Arredondo, RN (CC/VA); Susan Brown (VA/R); Barbara J. Ciscato (CC/VA); Joseph M. Civantos, MD (O); Celeste Figliulo (VA/R); Sohail Hasan, MD (O); Belinda Kosinski, COA (VA/R); Dan Muir (OP/OCT); Kiersten Nelson (OP/OCT); Kirk Packo, MD (O); John S. Pollack, MD (O); Kourous Rezaei, MD (O); Gina Shelton (VA); Shannya Townsend-Patrick (OP/OCT); Marian Walsh, CRA (OP/OCT).

**West Coast Retina Medical Group, Inc. (San Francisco, CA):** H. Richard McDonald, MD (PI); Nina Ansari (VA/R/OCT); Amanda Bye, (OP/OCT); Arthur D. Fu, MD (O); Sean Grout (OP/OCT); Chad

Indermill (OCT); Robert N. Johnson, MD (O); J. Michael Jumper, MD (O); Silvia Linares (VA/R); Brandon J. Lujan, MD (O); Ames Munden (OP/OCT); Meredith Persons (CC); Rosa Rodriguez (CC); Jennifer M. Rose (CC); Brandi Teske, COA (VA/R); Yesmin Urias (OCT); Stephen Young (OP/OCT).

**Retina Northwest, P.C. (Portland, OR):** Richard F. Dreyer, MD (PI); Howard Daniel (OP/OCT); Michele Connaughton, CRA (OP/OCT); Irvin Handelman, MD (O); Stephen Hobbs (VA/R/OCT); Christine Hoerner (OP/OCT); Dawn Hudson (VA/R/OCT); Marcia Kopfer, COT (CC/VA/R/OCT); Michael Lee, MD (O); Craig Lemley, MD (O); Joe Logan, COA (OP/OCT); Colin Ma, MD (O); Christophe Mallet (VA/R); Amanda Milliron (VA/R); Mark Peters, MD (O); Harry Wohlsein, COA (OP).

**Retinal Consultants Medical Group, Inc. (Sacramento, CA):** Joel A. Pearlman, MD, PHD (PI); Margo Andrews (OP/OCT); Melissa Bartlett (OCT); Nanette Carlson (CC/OCT); Emily Cox (VA/R); Robert Equi, MD (O); Marta Gonzalez (VA/R/OCT); Sophia Griffin (OP/OCT); Fran Hogue (VA/R); Lance Kennedy (OP/OCT); Lana Kryuchkov (OCT); Carmen Lopez (VA/R); Danny Lopez (OP/OCT); Bertha Luevano (VA/R); Erin McKenna, (CC); Arun Patel, MD (O); Brian Reed, MD (O); Nyla Secor (CC/OCT); Iris R. Sison (CC); Tony Tsai, MD (O); Nina Varghis, (CC); Brooke Waller (OCT); Robert Wendel, MD (O); Reina Yebra (OCT).

**Retina Vitreous Center, PA (New Brunswick, NJ):** Daniel B. Roth, MD (PI); Jane Deinzer, RN (CC/VA/R); Howard Fine, MD MHSC (O); Flory Green (VA/R); Stuart Green, MD (O); Bruce Keyser, MD (O); Steven Leff, MD (O); Amy Leviton (VA/R); Amy Martir (OCT); Kristin Mosenthine (VA/R/OCT); Starr Muscle, RN (CC); Linda Okoren (VA/R); Sandy Parker (VA/R); Jonathan Prenner, MD (O); Nancy Price (CC); Deana Rogers (OP/OCT); Linda Rosas (OP/OCT); Alex Schlosser (OP/OCT); Loretta Studenko (DE); Thea Tantum (CC); Harold Wheatley, MD (O).

**Vision Research Foundation/Associated Retinal Consultants, P.C. (Royal Oak, MI):** Michael T. Trese, MD (PI); Thomas Aaberg, MD (O); Tina Bell (VA/R/OP/OCT); Denis Bezaire, CRA (OP/OCT); Craig Bridges, CRA (OP/OCT); Doug Bryant, CRA (OP/OCT); Antonio Capone, MD (O); Michelle Coleman, RN (CC); Christina Consolo, CRA, COT (OP/OCT); Cindy Cook, RN (CC); Candice DuLong (VA/R); Bruce Garretson, MD (O); Tracy Grooten (VA/R); Julie Hammersley, RN (CC); Tarek Hassan, MD (O); Heather Jessick (OP/OCT); Nanette Jones (VA/R/OP/OCT); Crystal Kinsman (VA/R); Jennifer Krumlauf (VA/R); Sandy Lewis, COT (VA/R/OP/OCT); Heather Locke (VA/R); Alan Margherio, MD (O); Debra Markus, COT (CC/VA/R/OP/OCT); Tanya Marsh, COA (OP/OCT); Serena Neal (CC); Amy Noffke, MD (O); Kean Oh, MD (O); Clarence Pence (OP/OCT); Lisa Preston (VA/R); Paul Raphaelian, MD (O); Virginia R. Regan, RN, CCRP (VA/R); Peter Roberts (OP/OCT); Alan Ruby, MD (O); Ramin Sarrafizadeh, MD, PHD (O); Marissa Scherf (OP/OCT); Sarita Scott (VA/R); Scott Sneed, MD (O); Lisa Staples (CC); Brad Terry (VA/R/OP/OCT); Matthew T. Trese (OCT); Joan Videtich, RN (VA/R); George Williams, MD (O); Mary Zajechowski, COT, CCRC (CC/VA/R).

**Barnes Retina Institute (St. Louis, MO):** Daniel P. Joseph, MD (PI); Kevin Blinder, MD (O); Lynda Boyd, COT (VA/R); Sarah Buckley (OP/OCT); Meaghan Crow (VA/R); Amanda Dinatale, (OCT); Nicholas Engelbrecht, MD (O); Bridget Forke (OP/OCT); Dana Gabel (OP/OCT); Gilbert Grand, MD (O); Jennifer Grillion-Cerone (VA/R); Nancy Holekamp, MD (O); Charlotte Kelly, COA (VA/R); Ginny Nobel, COT (CC); Kelly Pepple (VA/R); Matt Raeber, (OP/OCT); P. Kumar Rao, MD (O); Tammy Ressel, COT (VA/R); Steven Schremp (OCT); Merrilee Sgorlon (VA/R); Shantia Shears, MA (CC); Matthew Thomas, MD (O); Cathy Timma (VA/R); Annette Vaughn, (OP/OCT); Carolyn Walters, COT (CC/VA/R); Rhonda Weeks, CRC (CC/VA/R); Jarrod Wehmeier (OP/OCT); Tim Wright (OCT).

**The Retina Group of Washington (Chevy Chase, MD):** Daniel M. Berinstein, MD (PI); Aida Ayyad (VA/R); Mohammed K. Barazi, MD (O); Erica Bickhart (CC/VA/R); Tracey Brady (OCT); Lisa Byank, MA (CC); Alysia Cronise, COA (VA/R); Vanessa Denny (VA/R); Courtney Dunn (VA/R); Michael Flory

(OP/OCT); Robert Frantz (OP/OCT); Richard A. Garfinkel, MD (O); William Gilbert, MD (O); Michael M. Lai, MD, PHD (O); Alexander Melamud, MD (O); Janine Newgen (VA/R); Shamekia Newton (CC); Debbie Oliver (CC); Michael Osman, MD (O); Reginald Sanders, MD (O); Manfred von Fricken, MD (O).

**Retinal Consultants of Arizona (Phoenix, AZ):** Pravin Dugel, MD (PI); Sandra Arenas (CC); Gabe Balea (OCT); Dayna Bartoli (OP/OCT); John Bucci (OP/OCT); Jennifer A. Cornelius (CC); Scheleen Dickens, (CC); Don Doherty (OP/OCT); Heather Dunlap, COA (VA/R); David Goldenberg, MD (O); Karim Jamal, MD (O); Norma Jimenez (OP/OCT); Nicole Kavanagh (VA/R); Derek Kunimoto, MD (O); John Martin (OP/OCT); Jessica Miner, RN (VA/R); Sarah Mobley, CCRC (CC/VA/R); Donald Park, MD (O); Edward Quinlan, MD (O); Jack Sipperley, MD (O); Carol Slagle (R); Danielle Smith (OP/OCT); Miguelina Yafchak (OCT); Rohana Yager, COA (OP/OCT).

**Casey Eye Institute (Portland, OR):** Christina J. Flaxel, MD (PI); Steven Bailey, MD (O); Peter Francis, MD, PHD (O); Chris Howell, (OCT); Thomas Hwang, MD (O); Shirley Ira, COT (VA/R); Michael Klein, MD (O); Andreas Lauer, MD (O); Teresa Liesegang, COT (CC/VA/R); Ann Lundquist, (CC/VA/R); Sarah Nolte (DE); Susan K. Nolte (VA/R); Scott Pickell (OP/OCT); Susan Pope, COT (VA/R); Joseph Rossi (OP/OCT); Mitchell Schain (VA/R); Peter Steinkamp, MS (OP/OCT); Maureen D. Toomey (CC/VA/R); Debora Vahrenwald, COT (VA/R); Kelly West (OP/OCT).

**Emory Eye Center (Atlanta, GA):** Baker Hubbard, MD (PI); Stacey Andelman, MMSC, COMT (CC/VA/R); Chris Bergstrom, MD (O); Judy Brower, COMT (CC/VA/R); Blaine Cribbs, MD (O); Linda Curtis (VA/R); Jannah Dobbs (OP/OCT); Lindreth DuBois, MED, MMSC, CO, COMT (CC/VA/R); Jessica Gaultney (OCT); Deborah Gibbs, COMT, CCRC (VA/R); Debora Jordan, CRA (OP/OCT); Donna Leef, MMSC, COMT (VA/R); Daniel F. Martin, MD (O); Robert Myles, CRA (OP); Timothy Olsen, MD (O); Bryan Schwent, MD (O); Sunil Srivastava, MD (O); Rhonda Waldron, MMSC, COMT, CRA, RDMS (OCT).

**Charlotte Eye, Ear, Nose & Throat Associates/Southeast Clinical Research (Charlotte, NC):** Andrew N. Antoszyk, MD (PI); Uma Balasubramaniam, COA (OCT); Danielle Brooks, CCRP (VA/R); Justin Brown, MD (O); David Browning, MD, PHD (O); Loraine Clark, COA (OP/OCT); Sarah Ennis, CCRC (VA/R); Susannah Held (OCT); Jennifer V. Helms, CCRC,(CC); Jenna Herby, CCRC (CC); Angie Karow, CCRP (VA/R); Pearl Leotaud, CRA (OP/OCT); Caterina Massimino (OCT); Donna McClain, COA (OP/OCT); Michael McOwen, CRA (OP/OCT); Jennifer Mindel, CRA, COA (OP/OCT); Candace Pereira, CRC (CC); Rachel Pierce, COA (VA/R); Michele Powers (OP/OCT); Angela Price, MPH, CCRC (CC); Jason Rohrer (CC); Jason Sanders, MD (O).

**California Retina Consultants (Santa Barbara, CA):** Robert L. Avery, MD (PI); Kelly Avery (VA/R); Jessica Basefsky (CC/OCT); Liz Beckner (OP); Alessandro Castellarin, MD (O); Stephen Couvillion, MD (O); Jack Giust (CC/OCT); Matthew Giust (OP); Maan Nasir, MD (O); Dante Pieramici, MD (O); Melvin Rabena (VA/R); Sarah Risard (VA/R/OCT/DE); Robert See, MD (O); Jerry Smith (VA/R); Lisha Wan (VA/R).

**Mayo Clinic (Rochester, MN):** Sophie J. Bakri, MD (PI); Nakhleh Abu-Yaghi, MD (O); Andrew Barkmeier, MD (O); Karin Berg, COA (VA/R); Jean Burrington, COA (VA/R); Albert Edwards, MD (O); Shannon Goddard, COA (OP/OCT); Shannon Howard (VA/R); Raymond Iezzi, MD (O); Denise Lewison, COA (OP/OCT); Thomas Link, CRA (OP/OCT); Colin A. McCannel, MD (O); Joan Overend (VA/R); John Pach, MD (O); Margaret Ruszczyk, CCRP (CC); Ryan Shultz, MD (O); Cindy Stephan, COT (VA/R); Diane Vogen (CC).

**Dean A. McGee Eye Institute (Oklahoma City, OK):** Reagan H. Bradford Jr, MD (PI); Vanessa Bergman, COA, CCRC (CC); Russ Burris (OP/OCT); Amanda Butt, CRA (OP/OCT); Beth Daniels, COA (CC); Connie Dwiggin, CCRC (CC); Stephen Fransen, MD (O); Tiffany Guerrero (CC/DE); Darin Haivala, MD (O); Amy Harris (CC); Sonny Icks (CC/DE); Ronald Kingsley, MD (O); Lena Redden (VA/R); Rob Richmond (OP/OCT); Brittany Ross (VA/R); Kammerin White, CCRC (VA/R); Misty Youngberg, COA, CCRC (VA/R).

**Ophthalmic Consultants of Boston (Boston, MA):** Trexler M. Topping, MD (PI); Steve Bennett (OCT); Sandy Chong (VA/R); Mary Ciotti, COA (CC); Tina Cleary, MD (O); Emily Corey (VA/R); Dennis Donovan (OP/OCT); Albert Frederick, MD (O); Lesley Freese (CC/VA/R); Margaret Graham (OP/OCT); Natalya Gud, COA (VA/R); Taneika Howard (VA/R); Mike Jones (OP/OCT); Michael Morley, MD (O); Katie Moses (VA/R); Jen Stone (VA/R); Robin Ty, COA (VA/R); Torsten Wiegand, PHD, MD (O); Lindsey Williams (CC); Beth Winder (CC).

**Tennessee Retina, P.C. (Nashville, TN):** Carl C. Awh, MD (PI); Michelle Amonette (OCT); Everton Arrindell, MD (O); Dena Beck (OCT); Brandon Busbee, MD (O); Amy Dilback (OP/OCT); Sara Downs (VA/R); Allison Guidry, COA (VA/R); Gary Gutow, MD (O); Jackey Hardin (VA/R); Sarah Hines, COA (CC); Emily Hutchins (VA/R); Kim LaCivita, MA (OP/OCT); Ashley Lester (OP/OCT); Larry Malott (OP/OCT); MaryAnn McCain, RN, CNOR (CC); Jayme Miracle (VA/R); Kenneth Moffat, MD (O); Lacy Palazzotta (VA/R); Kelly Robinson, COA (VA/R); Peter Sonkin, MD (O); Alecia Travis (OP/OCT); Roy Trent Wallace, MD (O); Kelly J. Winters, COA (CC); Julia Wray (OP/OCT).

**Retina Associates Southwest, P.C. (Tucson, AZ):** April E. Harris, MD (PI); Mari Bunnell (OCT); Katrina Crooks (VA/R); Rebecca Fitzgerald, CCRC (CC/OCT); Cameron Javid, MD (O); Corin Kew (VA/R); Erica Kill, VAE (VA/R); Patricia Kline (VA/R); Janet Kreienkamp (VA/R); Maricruz Martinez (CC/OCT); Roy Ann Moore, OMA (CC/OCT); Egbert Saavedra, MD (O); LuAnne Taylor, CSC (CC/OCT); Mark Walsh, MD (O); Larry Wilson (OP).

**Midwest Eye Institute (Indianapolis, IN):** Thomas A. Ciulla, MD (PI); Ellen Coyle, COMT (VA/R); Tonya Harrington, COA (VA/R); Charlotte Harris, COA (VA/OCT); Cindi Hood (OCT); Ingrid Kerr, COA (VA/R); Raj Maturi, MD (O); Dawn Moore (OCT); Stephanie Morrow, COA (OP); Jennifer Savage, COA (VA); Bethany Sink, COA (CC/VA/R); Tom Steele, CRA (OP); Neelam Thukral, CCRC (CC/OCT); Janet Wilburn, COA (CC).

**National Ophthalmic Research Institute (Fort Myers, FL):** Joseph P. Walker, MD (PI); Jennifer Banks (VA/R); Debbie Ciampaglia (OP/OCT); Danielle Dyshanowitz (VA/R); Jennifer Frederick, CRC (CC); A. Tom Ghuman, MD (O); Richard Grodin, MD (O); Cheryl Kiesel, CCRC (CC); Eileen Knips, RN, CCRC, CRA (OP/OCT); Jonathan McCue (VA/R); Maria Ortiz (VA/R); Crystal Peters, CCRC (CC); Paul Raskauskas, MD (O); Etienne Schoeman (OP/OCT); Ashish Sharma, MD (O); Glenn Wing, MD (O); Rebecca Youngblood (CC).

**University of Wisconsin Madison (Madison, WI):** Suresh R. Chandra, MD (PI); Michael Altaweel, MD (O); Barbara Blodi, MD (O); Kathryn Burke, BA (VA/R); Kristine A. Dietzman, (CC); Justin Gottlieb, MD (O); Gene Knutson (OP/OCT); Denise Krolnik (OP/OCT); T. Michael Nork, MD (O); Shelly Olson (VA/R); John Peterson, CRA (OP/OCT); Sandra Reed (OP/OCT); Barbara Soderling (VA/R); Guy Somers (VA/R); Thomas Stevens, MD (O); Angela Wealti, (CC).

**Duke University Eye Center (Durham, NC):** Srilaxmi Bearely, MD (PI); Brenda Branchaud (VA/R); Joyce W. Bryant, COT, CPT (CC/VA/R); Sara Crowell (CC/VA); Sharon Fekrat, MD (O); Merritt Gammage (OP/OCT); Cheala Harrison, COA (VA/R); Sarah Jones (VA); Noreen McClain, COT, CPT, CCRC (VA/R); Brooks McCuen, MD (O); Prithvi Mruthyunjaya, MD (O); Jeanne Queen, CPT

(OP/OCT); Neeru Sarin, MBBS (VA/R); Cindy Skalak, RN, COT (VA/R); Marriner Skelly, CRA (OP/OCT); Ivan Suner, MD (O); Ronnie Tomany (OP/OCT); Lauren Welch (OP/OCT).

**University of California-Davis Medical Center (Sacramento, CA):** Susanna S. Park, MD, PHD (PI); Allison Cassidy (VA/R); Karishma Chandra (OP/OCT); Idalew Good (VA/R); Katrina Imson (CC); Sashi Kaur (OP/OCT); Helen Metzler, COA, CCRP (CC/VA/R); Lawrence Morse, MD, PHD (O); Ellen Redenbo, ROUB (OP/OCT); Marisa Salvador (VA/R); David Telander, MD (O); Mark Thomas, CRA (OCT); Cindy Wallace, COA (CC).

**University of Louisville School of Medicine, KY (Louisville, KY):** Charles C. Barr, MD (PI); Amanda Battcher (VA/R); Michelle Bottorff, COA (CC/OCT); Mary Chasteen (VA/R); Kelly Clark (VA/R); Diane Denning, COT (OCT); Debra Schoen (OP); Amy Schultz (OP); Evie Tempel, CRA, COA (OP); Lisa Wheeler, COT (VA/R); Greg K. Whittington, MPS, PSY (CC).

**Retina Associates of Kentucky (Lexington, KY):** Thomas W. Stone, MD (PI); Todd Blevins (OP/OCT); Michelle Buck, COT, (VA/R/OCT); Lynn Cruz, COT (CC); Wanda Heath (VA/R); Diana Holcomb (VA/R); Rick Isernhagen, MD (O); Terri Kidd, COA (OCT); John Kitchens, MD (O); Cathy Sears, CST, COA (VA/R); Ed Slade, CRA, COA (OP/OCT); Jeanne Van Arsdall, COA (VA/R); Brenda VanHoose, COA (VA/R); Jenny Wolfe, RN (CC); William Wood, MD (O).

**Colorado Retina Associates (Denver, CO):** John Zilis, MD (PI); Carol Crooks, COA (VA/R); Larry Disney (VA/R); Mimi Liu, MD (O); Stephen Petty, MD (O); Sandra Sall, ROUB, COA (CC/VA/R/OP/OCT).

**University of Iowa Hospitals & Clinics (Iowa City, IA):** James C. Folk, MD (PI); Tracy Aly, CRA (OP/OCT); Abby Brotherton (VA); Douglas Critser, CRA (OP/OCT); Connie J. Hinz, COT, CCRC (CC/VA/R); Stefani Karakas, CRA (OP/OCT); Valerie Kirschner (VA); Cheyanne Lester (VA/R); Cindy Montague, CRA (OP/OCT); Stephen Russell, MD (O); Heather Stockman (VA/R); Barbara Taylor, CCRC (VA/R); Randy Verdick, FOPS (OP/OCT), Jean Walshire (CC).

**Retina Specialists (Towson, MD):** John T. Thompson, MD (PI) ; Barbara Connell (VA/R); Maryanth Constantine (CC); John L. Davis Jr (VA/R); Gwen Holsapple (VA/R); Lisa Hunter (OP/OCT); C. Nicki Lenane (CC/VA/R/OP/OCT); Robin Mitchell (CC); Leslie Russel, CRA (OP/OCT); Raymond Sjaarda, MD (O).

**Retina Consultants of Houston (Houston, TX):** David M. Brown, MD (PI); Matthew Benz, MD (O); Llewellyn Burns (OCT); JoLene G. Carranza, COA, CCRC (CC); Richard Fish, MD (O); Debra Goates (VA/R); Shayla Hay (VA/R); Theresa Jeffers, COT (VA/R); Eric Kegley, CRA, COA (OP/OCT); Dallas Kubecka (VA/R); Stacy McGilvra (VA/R); Beau Richter (OCT); Veronica Sneed, COA (VA/R); Cary Stoever (OCT); Isabell Tellez (VA/R); Tien Wong, MD (O).

**Massachusetts Eye and Ear Infirmary/Harvard Vanguard Medical Associates (Boston, MA):** Ivana Kim, MD (PI); Christopher Andreoli, MD (O); Leslie Barresi, CRA, COA, OCT-C (VA/OP/OCT); Sarah Brett (OP); Charlene Callahan (OP); Karen Capaccioli (OCT); William Carli, COA (VA/R/OCT); Matthew Coppola, COA (VA); Nicholas Emmanuel (CC); Claudia Evans, OD (VA/R); Anna Fagan, COA (VA/R); Marcia Grillo (OCT); John Head, CRA, OCT-C (OP/OCT); Troy Kieser, COA, OCT-C (CC/VA/R); Elaine Lee, COA (VA); Ursula Lord, OD (VA/R); Edward Miretsky (CC); Kate Palitsch (OP/OCT); Todd Petrin, RN (OCT); Liz Reader (CC); Svetlana Reznichenko, COA (VA); Mary Robertson, COA (VA); Justin Smith, OD (VA/R); Demetrios Vavvas, MD, PHD (O).

**Palmetto Retina Center (West Columbia, SC):** John Wells, MD (PI); Cassie Cahill (VA/R); W. Lloyd Clark, MD (O); Kayla Henry (VA/R); David Johnson, MD (O); Peggy Miller (CC/VA/R); LaDetrick Oliver, COT (OP/OCT); Robbin Spivey (OP/OCT); Tiffany Swinford (VA/R); Mallie Taylor (CC).

**Retina and Vitreous of Texas (Houston, TX):** Michael Lambert, MD (PI); Kris Chase (OP/OCT); Debbie Fredrickson, COA (VA/R); Joseph Khawly, MD, FACS (O); Valerie Lazarte (VA/R); Donald Lowd (OP/OCT); Pam Miller (CC); Arthur Willis, MD (O).

**Long Island Vitreoretinal Consultants (Great Neck, NY):** Philip J. Ferrone, MD (PI); Miguel Almonte (OCT); Rachel Arnott, (CC); Ingrid Aviles (VA/R/OCT); Sheri Carbon (VA/R); Michael Chitjian (OP/OCT); Kristen D'Amore (CC); Christin Elliott (VA/R); David Fastenberg, MD (O); Barry Golub, MD (O); Kenneth Graham, MD (O); AnnMarie Laverna (CC); Laura Murphy (VA/R); Amanda Palomo (VA/R); Christina Puglisi (VA/R); David Rhee, MD (O); Juan Romero, MD (O); Brett Rosenblatt, MD (O); Glenda Salcedo (OP/OCT); Marianne Schlameuss, RN (CC); Eric Shakin, MD (O); Vasanti Sookhai (VA/R).

**Wills Eye Institute (Philadelphia, PA):** Richard Kaiser, MD (PI); Elizabeth Affel, MS, OCT-C (OCT); Gary Brown, MD (O); Christina Centinaro (CC); Deborah Fine, COA (OCT); Mitchell Fineman, MD (O); Michele Formoso (CC); Sunir Garg, MD (O); Lisa Grande (VA/R); Carolyn Herbert (VA/R); Allen Ho, MD (O); Jason Hsu, MD (O); Maryann Jay (OCT); Lisa Lavetsky (OCT); Elaine Liebenbaum (OP); Joseph Maguire, MD (O); Julia Monsonago (OP/OCT); Lucia O'Connor (OCT); Lisa Pierce (CC); Carl Regillo, MD (O); Maria Rosario (DE); Marc Spirn, MD (O); James Vander, MD (O); Jennifer Walsh (VA/R).

**Ohio State University Eye Physicians & Surgeons-Retina Division (Dublin, OH):** Frederick H. Davidorf, MD (PI); Amanda Barnett (OP/OCT); Susie Chang, MD (O); John Christoforidis, MD (O); Joy Elliott (CC); Heather Justice (VA/R); Alan Letson, MD (O); Kathrynne McKinney, COMT (CC); Jeri Perry, COT (VA/R); Jill A. Salerno, COA (CC); Scott Savage (OP); Stephen Shelley (OCT).

**Retina Associates of Cleveland (Beachwood, OH):** Lawrence J. Singerman, MD (PI); Joseph Coney, MD (O); John DuBois (OP/OCT); Kimberly DuBois, LPN, CCRP, COA (VA/R); Gregg Greanoff, CRA (OP/OCT); Dianne Himmelman, RN, CCRP (CC); Mary Ilc, COT (VA/R); Elizabeth Mcnamara (VA/R/OP); Michael Novak, MD (O); Scott Pendergast, MD (O); Susan Rath, PA-C (CC); Sheila Smith-Brewer, CRA (OP/OCT); Vivian Tanner, COT, CCRP (VA/R); Diane E. Weiss, RN, (CC); Hernando Zegarra, MD (O).

**Retina Group of Florida (Fort Lauderdale, FL):** Lawrence Halperin, MD (PI); Patricia Aramayo (OCT); Mandeep Dhalla, MD (O); Brian Fernandez, MD (OP/OCT); Cindy Fernandez, MD (CC); Jaclyn Lopez (CC); Monica Lopez (OCT); Jamie Mariano, COA (VA/R); Kellie Murphy, COA (OCT); Clifford Sherley, COA (VA/R); Rita Veksler, COA (OP/OCT).

**Retina-Vitreous Associates Medical Group (Beverly Hills, CA):** Firas Rahhal, MD (PI); Razmig Babikian (DE); David Boyer, MD (O); Sepideh Hami (DE); Jeff Kessinger (OP/OCT); Janet Kurokouchi (CC); Saba Mukarram (VA/R); Sarah Pachman (VA/R); Eric Protacio (OCT); Julio Sierra (VA/R); Homayoun Tabandeh, MD, MS, FRCP (O); Adam Zamboni (VA/R).

**Elman Retina Group, P.A. (Baltimore, MD):** Michael Elman, MD (PI); Jennifer Belz (CC); Tammy Butcher (CC); Theresa Cain (OP/OCT); Teresa Coffey, COA (VA/R); Dena Firestone (VA/R); Nancy Gore (VA/R); Pamela Singletary (VA/R); Peter Sotirakos (OP/OCT); JoAnn Starr (CC).

**University of North Carolina at Chapel Hill (Chapel Hill, NC):** Travis A. Meredith, MD (PI); Cassandra J. Barnhart, MPH (CC/VA/R); Debra Cantrell, COA (VA/R/OP/OCT); RonaLyn Esquejo-Leon (OP/OCT); Odette Houghton, MD (O); Harpreet Kaur (VA/R); Fatoumatta NDure, COA (CC).

**Ophthalmologists Enrolling Patients but No Longer Affiliated with a CATT Center:** Ronald Glatzer, MD (O); Leonard Joffe, MD (O); Reid Schindler, MD (O).

### Resource Centers

**Chairman's Office (Cleveland Clinic, Cleveland, OH):** Daniel F. Martin, MD (Chair); Stuart L. Fine, MD (Vice-Chair; University of Colorado, Denver, CO); Marilyn Katz (Executive Assistant).

**Coordinating Center (University of Pennsylvania, Philadelphia, PA):** Maureen G. Maguire, PhD (PI); Mary Brightwell-Arnold, SCP (Systems Analyst); Ruchira Glaser, MD (Medical Monitor); Judith Hall (Protocol Monitor); Sandra Harkins (Staff Assistant); Jiayan Huang, MS (Biostatistician); Alexander Khvatov, MS (Systems Analyst); Kathy McWilliams, CCRP (Protocol Monitor); Susan K. Nolte (Protocol Monitor); Ellen Peskin, MA, CCRP (Project Director); Maxwell Pistilli, MS, MEd (Biostatistician); Susan Ryan (Financial Administrator); Allison Schnader (Administrative Coordinator); Gui-Shuang Ying, PhD (Senior Biostatistician).

**OCT Reading Center (Duke University, Durham, NC):** Glenn Jaffe, MD (PI); Jennifer Afrani-Sakyi (CATT PowerPoint Presentations); Brannon Balsley (OCT Technician Certifications); Linda S. Bennett (Project Manager); Adam Brooks (Reader/SD-Reader); Adrienne Brower-Lingsch (Reader); Lori Bruce (Data Verification); Russell Burns (Senior Technical Analyst/Senior Reader/SD Reader/OCT Technician Certifications); Dee Busian (Reader); John Choong (Reader); Lindsey Cloaninger (Reader Reliability Studies/ Document Creation/CATT PPT Files); Francis Char DeCroos (Research Associate); Emily DuBois (Data Entry); Mays El-Dairi (Reader/SD-Reader); Sarah Gach (Reader); Katelyn Hall (Project Manager/Reader Reliability Studies/ Data Verification/Document Creation); Terry Hawks (Reader); ChengChenh Huang (Reader); Cindy Heydary (Senior Reader/Quality Assurance Coordinator/SD Reader/Data Verification); Alexander Ho (Reader, Transcription); Shashi Kini (Data Entry/Transcription); Michelle McCall (Data Verification); Daaimah Muhammad (Reader Feedback); Jayne Nicholson (Data Verification); Jeanne Queen (Reader/SD-Reader); Pamela Rieves (Transcription); Kelly Shields (Senior Reader); Cindy Skalak (Reader); Adam Specker (Reader); Sandra Stinnett (Biostatistician); Sujatha Subramaniam (Reader); Patrick Tenbrink (Reader); Cynthia Toth, MD (Director of Grading); Aaron Towe (Reader); Kimberly Welch (Data Verification); Natasha Williams (Data Verification); Katrina Winter (Senior Reader); Ellen Young (Senior Project Manager).

**Fundus Photograph Reading Center (University of Pennsylvania, Philadelphia, PA):** Juan E. Grunwald, MD (PI); Judith Alexander (Director); Ebenezer Daniel, MBBS, MS, MPH, PhD (Director); Elisabeth Flannagan (Administrative Coordinator); E. Revell Martin (Reader); Candace Parker (Reader); Krista Sepielli (Reader); Tom Shannon (Systems Analyst); Claressa Whearry (Data Coordinator).

**National Eye Institute, National Institutes of Health:** Maryann Redford, DDS, MPH (Program Officer).

## Committees

**Executive Committee:** Daniel F. Martin, MD (chair); Robert L. Avery, MD; Sophie J. Bakri, MD; Ebenezer Daniel, MBBS, MS, MPH; Stuart L. Fine, MD; Juan E. Grunwald, MD; Glenn Jaffe, MD, Marcia R. Kopfer, BS, COT; Maureen G. Maguire, PhD; Travis A. Meredith, MD; Ellen Peskin, MA, CCRP; Maryann Redford, DDS, MPH; David F. Williams, MD.

**Operations Committee:** Daniel F. Martin, MD (chair); Linda S. Bennett; Ebenezer Daniel, MBBS, MS, MPH; Frederick L. Ferris III, MD; Stuart L. Fine, MD; Juan E. Grunwald, MD; Glenn Jaffe, MD; Maureen G. Maguire, PhD; Ellen Peskin, MA, CCRP; Maryann Redford, DDS, MPH; Cynthia Toth, MD.

**Clinic Monitoring Committee:** Ellen Peskin, MA, CCRP (chair); Mary Brightwell-Arnold, SCP; Joan DuPont; Maureen G. Maguire, PhD; Kathy McWilliams, CCRP; Susan K. Nolte.

**Data and Safety Monitoring Committee:** Lawrence M. Friedman, MD (chair); Susan B. Bressler, MD; David L. DeMets, PhD; Martin Friedlander, MD, PhD; Mark W. Johnson, MD; Anne Lindblad, PhD; Douglas W. Losordo, MD, FACC; Franklin G. Miller, PhD.
